# Supplementary material for: Investigation of DNA Hybridization on Nano-Structured Plasmonic Surfaces for Identifying Nasopharyngeal Viruses
Source: MDPI journal article supplement (doi:10.3390/bioengineering10101189), 2023-10-13
Supplement: s1 [file s1]

## Supplemental Materials

# Investigation of DNA Hybridization on Nano-Structured Plasmonic Surfaces for Identifying Nasopharyngeal Viruses

Shao-Sian Li <sup>1,†</sup>, Yi-Jung Lu <sup>2,†</sup>, Ray Chang <sup>3</sup>, Ming-Han Tsai <sup>4</sup>, Jo-Ning Hung <sup>4</sup>, Wei-Hung Chen <sup>3</sup>, Yu-Jui Fan <sup>5,\*</sup>, Pei-Kuen Wei <sup>6,\*</sup> and Horn-Jiunn Sheen <sup>3,\*</sup>

<sup>1</sup> Department of Materials and Mineral Resources, National Taipei University of Technology, Taipei 10608, Taiwan; ssl@mail.ntut.edu.tw

<sup>2</sup> Division of Family and Operative Dentistry, Department of Dentistry, Taipei Medical University Hospital, Taipei 11031, Taiwan; yi\_jung2002@yahoo.com.tw

<sup>3</sup> Institute of Applied Mechanics, National Taiwan University, No. 1, Section 4, Roosevelt Rd, Taipei 10617, Taiwan; d11543004@ntu.edu.tw (R.C.); r09543071@ntu.edu.tw (W.-H.C.)

<sup>4</sup> Institute of Microbiology & Immunology, National Yang Ming Chiao Tung University, No. 155, Section 2, Linong St., Beitou District, Taipei 11221, Taiwan; m.tsai@gm.ym.edu.tw (M.-H.T.); cheeseerer0707@gm.ym.edu.tw (J.-N.H.)

<sup>5</sup> School of Biomedical Engineering, College of Biomedical Engineering, Taipei Medical University, Taipei 11031, Taiwan

<sup>6</sup> Research Center for Applied Sciences, Academia Sinica, 128 Academia Road, Section 2, Nankang, Taipei 11529, Taiwan

\* Correspondence: ray.yj.fan@tmu.edu.tw (Y.-J.F.); pkwei@sinica.edu.tw (P.-K.W.); sheenh@ntu.edu.tw (H.-J.S.)

† These authors contributed equally to this work.

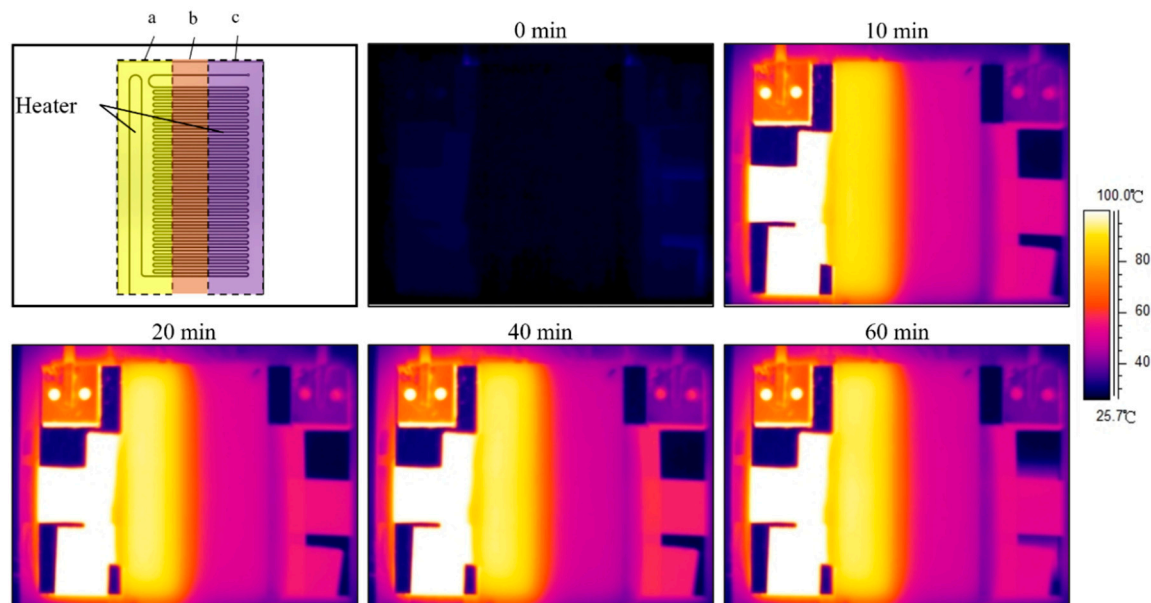

**Figure S1.** Characterization of the device. Temperatures were steady in the three regions; a (95 °C), b (65 °C), and c (50 °C). These temperature regions are used for denaturation (95 °C), extension (80-65 °C), detection (65 °C), and annealing (50 °C).

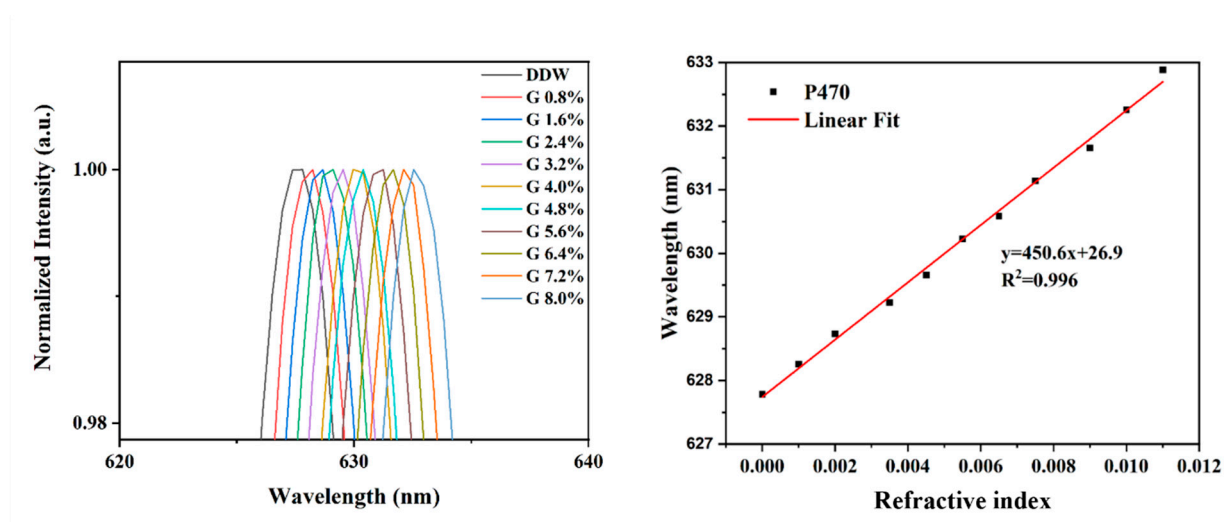

**Figure S2.** Relations between the resonance wavelength and refractive index in different glucose solutions.

**Table S1.** Primer templates and probes

|               | <i>COVID-19 N-gene</i>                                                                                                                                  | <i>LMP1</i>                                                                                                                                                                                                                                                                                                                                     |
|---------------|---------------------------------------------------------------------------------------------------------------------------------------------------------|-------------------------------------------------------------------------------------------------------------------------------------------------------------------------------------------------------------------------------------------------------------------------------------------------------------------------------------------------|
| Template      | 5'-CACATTGGCACCCGCAATCCTGCTA<br>ACAATGCTGCAATCGTGCTACAACTT<br>CCTCAAGGAACAACATTGCCAAAAGG<br>CTTCTACGCAGAAGGGAGCAGAGGGCG<br>GCAGTCAAGCCTCTTCTCGTTCCTC-3' | 5'-AGCGACTCTGCTGGAAATGATGGA<br>GGCCCTCCAAAATTGACGGAAGAGGT<br>TGAAAACAAAGGAGGTGACCGGGGCC<br>CGCCTTCGATGACAGACGGTGCGCGC<br>GGTCATCCACACCTTCCTACACTGCTT<br>TTGGGTACTTCTGGTTCCGGTGGAGAT<br>GATGACGACCCCCACGGCCCAGTTCA<br>GCTAAGCTACTATGACTAACCTTTCTT<br>TACTTCTAGGCATTACCATGTCATAGG<br>CTTGCCTGACTGACTCTCCCTCCATT<br>ACTGGGAATGCCTTAGCTAATCA<br>-3' |
| Forward       | 5'-CAC ATT GGC ACC CGC AAT C-3'                                                                                                                         | 5'-AGC GAC TCT GCT GGA AAT GAT-3'                                                                                                                                                                                                                                                                                                               |
| Reverse       | 5'-GAG GAA CGA GAA GAG GCT TG-3'                                                                                                                        | 5'-TGA TTA GCT AAG GCA TTC CCA-3'                                                                                                                                                                                                                                                                                                               |
| Probe         | 5'- TGG CAA TGT TGT TCC TTG AGG<br>AAG T -3'                                                                                                            | 5'-GTC ATA GTA GCT TAG CTG AAC<br>TGG GCC GT-3'                                                                                                                                                                                                                                                                                                 |
| Probe's $T_m$ | 58.8 °C                                                                                                                                                 | 63.7 °C                                                                                                                                                                                                                                                                                                                                         |

**Table S2.** Solution composition for PCR

|                               | Volume      | Final concentration |
|-------------------------------|-------------|---------------------|
| 2X Master Mix                 | 50 $\mu$ l  | 1X                  |
| Primer F (10 $\mu$ M)         | 2 $\mu$ l   | 0.2 $\mu$ M         |
| Primer R (10 $\mu$ M)         | 2 $\mu$ l   | 0.2 $\mu$ M         |
| DNA template (10 ng/ $\mu$ L) | 1 $\mu$ l   | -                   |
| Nuclease-free water           | 25 $\mu$ l  | -                   |
| <b>Total volume</b>           | 100 $\mu$ l | -                   |

**Table S3.** Solution composition for duplex PCR

|                                               | Volume      | Final concentration |
|-----------------------------------------------|-------------|---------------------|
| 2X Master Mix                                 | 50 $\mu$ l  | 1X                  |
| COVID-19 N-gene Primer F (10 $\mu$ M)         | 2 $\mu$ l   | 0.2 $\mu$ M         |
| COVID-19 N-gene Primer R (10 $\mu$ M)         | 2 $\mu$ l   | 0.2 $\mu$ M         |
| COVID-19 N-gene DNA template (10 ng/ $\mu$ L) | 1 $\mu$ l   | -                   |
| LMP1_Primer F (10 $\mu$ M)                    | 2 $\mu$ l   | 0.2 $\mu$ M         |
| LMP1_Primer R (10 $\mu$ M)                    | 2 $\mu$ l   | 0.2 $\mu$ M         |
| LMP1 DNA template (10 ng/ $\mu$ L)            | 1 $\mu$ l   | -                   |
| Nuclease-free water                           | 25 $\mu$ l  | -                   |
| <b>Total volume</b>                           | 100 $\mu$ l | -                   |

**Table S4.** The conditions of the traditional PCR machine.

|                      |       |        |
|----------------------|-------|--------|
| Initial denaturation | 95 °C | 5 min  |
| Denaturation         | 95 °C | 30 sec |
| Annealing            | 60 °C | 50 sec |
| Extension            | 72 °C | 50 sec |
| Final extension      | 72 °C | 10 min |
| Storage              | 4 °C  | 10 min |
